# Supplementary material
Source: publisher figshare collection journal article supplement (https://future-science-group.figshare.com/articles/dataset/_/22153667)
Supplement: Supplementary file 1 [file 2]

# Darolutamida e sobrevida de pacientes com câncer de próstata metastático hormônio-sensível: uma perspectiva do paciente e do cuidador, e um resumo do estudo ARASENS em linguagem simples

Matthew R Smith<sup>\*1</sup>, Maha Hussain<sup>2</sup>, Fred Saad<sup>3</sup>, Karim Fizazi<sup>4</sup>, Cora N Sternberg<sup>5</sup>, David Crawford<sup>6</sup>, Jan Manarite<sup>7,8</sup>, David Muslin<sup>9</sup>, Thomas Farrington<sup>9,10</sup> & Bertrand Tombal<sup>11</sup>

<sup>1</sup>Massachusetts General Hospital Cancer Center, Boston, MA, USA; <sup>2</sup>Northwestern University, Feinberg School of Medicine, Chicago, IL, USA; <sup>3</sup>University of Montreal Hospital Center, Montreal, Quebec, Canada; <sup>4</sup>Institut Gustave Roussy, University of Paris-Saclay, Villejuif, France; <sup>5</sup>Englander Institute for Precision Medicine, Weill Cornell Department of Medicine, Meyer Cancer Center, New York-Presbyterian Hospital, New York, NY, USA; <sup>6</sup>UC San Diego School of Medicine, San Diego, CA, USA; <sup>7</sup>Caregiver Author; <sup>8</sup>Cancer ABCs, Brooklyn, NY, USA; <sup>9</sup>Patient Author; <sup>10</sup>Prostate Health Education Network, Quincy, MA, USA; <sup>11</sup>Division of Urology, IREC, Cliniques Universitaires Saint Luc, UCLouvain, Brussels, Belgium

Primeira versão enviada: 27 de abril de 2022; Aceito para publicação: 17 de maio de 2022; Publicado on-line: 3 de junho de 2022

## Resumo

### Do que trata este resumo?

Este é um resumo de uma publicação sobre o estudo ARASENS, publicado no *New England Journal of Medicine* em fevereiro de 2022. O estudo incluiu 1.306 homens com um tipo de câncer de próstata denominado câncer de próstata metastático hormônio-sensível (também chamado de CPHSm). Neste estudo, os pesquisadores queriam saber se a combinação de um tratamento denominado **darolutamida** (também conhecido como Nubeqa®) com dois outros tratamentos denominados terapia de privação androgênica (também chamados de **TPA**) e **docetaxel** (nome comercial: Taxotere®) pode ajudar a tratar melhor os pacientes com CPHSm do que **placebo** com **TPA** e **docetaxel**. **TPA** com **docetaxel** é um tratamento usado em pacientes com CPHSm. **Darolutamida** é um tratamento já aprovado para um outro tipo de câncer de próstata, denominado câncer de próstata resistente à castração não-metastático (também chamado de CPRcnm).

Como pronunciar (clique duas vezes no ícone para reproduzir som)...

- **Darolutamida**: Da-ro-lu-ta-MI-de
- **Docetaxel**: Do-ce-ta-XEL

### Quais foram os resultados?

Os resultados do estudo mostraram que a combinação de **darolutamida** com **TPA** e **docetaxel** aumentou a chance de sobrevivência e reduziu o risco de morte em 32,5% em comparação com a combinação de **TPA** e **docetaxel** com **placebo**. Em comparação com os pacientes que receberam o **placebo**, os pacientes que receberam **darolutamida** tiveram um atraso:

- na progressão do câncer em resistente à castração
- na piora da dor
- em ter fraturas ósseas relacionadas ao câncer ou sintomas associados
- na necessidade de terapias adicionais para o câncer

A percentagem de pacientes do estudo que tiveram problemas médicos durante o estudo, também chamados de eventos adversos, foi semelhante entre os pacientes do estudo que receberam a **darolutamida** e aqueles que receberam o **placebo**.

### Qual é o significado dos resultados do estudo?

A combinação de **darolutamida** com **TPA** e **docetaxel** ajudou a tratar pacientes do estudo com CPHSm melhor do que o **placebo** com **TPA** e **docetaxel**. **Darolutamida** em combinação com **TPA** e **docetaxel** pode ser uma opção de tratamento para pacientes com CPHSm. Os pacientes devem sempre conversar com seus médicos e enfermeiros antes de tomar qualquer decisão sobre o seu tratamento. Este resumo também inclui perspectivas sobre o estudo ARASENS e o câncer de próstata fornecidas por três membros da comunidade de pacientes.

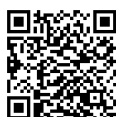

Um vídeo animado descrevendo este estudo está disponível online ao lado deste artigo. Digitalize este código QR para assistir ao vídeo.

## Para quem é destinado este artigo?

Este artigo é de coautoria de membros da comunidade de pacientes e inclui as perspectivas deles para ajudar pacientes e cuidadores a entenderem os resultados do estudo. O artigo também pode ser útil para defensores dos direitos do paciente, o público em geral e profissionais de saúde, incluindo aqueles que buscam opções de tratamento para o CPHSm.

## Qual foi o objetivo do estudo ARASENS?

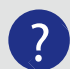

O objetivo do estudo ARASENS foi investigar se a combinação de **darolutamida** com **TPA** e **docetaxel** ajudaria a tratar pacientes com CPHSm melhor do que o **placebo** com **TPA** e **docetaxel**.

## O que é CPHSm e quais são alguns tratamentos possíveis para a condição?

# CP

Câncer de próstata

O câncer começou na próstata. Em pacientes com câncer de próstata, o corpo não consegue controlar o crescimento de células anormais da próstata. As células anormais formam tumores na próstata e podem se espalhar para outras partes do corpo.

# HS

hormônio-sensível

Às vezes chamadas de “sensível à castração”, também. O câncer pode ser tratado com terapia hormonal, como **TPA**.

# m

Metastático

O câncer se espalhou para outras partes do corpo.

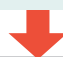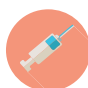

A **TPA** às vezes também é chamada de “terapia hormonal”. A **TPA** é uma terapia hormonal administrada como uma injeção sob a pele, também chamada de injeção subcutânea. A **TPA** também pode ser administrada via oral. A **TPA** reduz os níveis de testosterona, que é um tipo de hormônio andrógeno. Os hormônios andrógenos são um grupo de hormônios sexuais que normalmente dão aos homens suas características “masculinas”, como os pelos faciais. A redução dos níveis de testosterona pode reduzir ou retardar o crescimento das células cancerígenas. **TPA** com **docetaxel** é um dos padrões atuais para o tratamento de CPHSm.

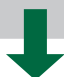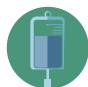

O **Docetaxel** (nome comercial: Taxotere®) é um tipo de quimioterapia usado no tratamento de diversos tipos de câncer. É administrado diretamente em uma veia, um procedimento também chamado de infusão intravenosa ou gotejamento IV. No estudo ARASENS, os pesquisadores queriam saber se a adição de um tratamento denominado **darolutamida** poderia ajudar a tratar pacientes com CPHSm melhor do que apenas com **TPA** e docetaxel.

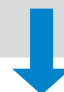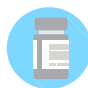

**Darolutamida** (nome comercial: Nubeqa®) é um medicamento em forma de comprimido e administrado por via oral. Os resultados de outro estudo denominado estudo ARAMIS mostraram que a **darolutamida** pode ajudar a tratar um tipo diferente de câncer de próstata denominado câncer de próstata não-metastático resistente à castração (CPRCnm). Os resultados do estudo ARAMIS podem ser lidos aqui: <https://www.nejm.org/doi/full/10.1056/NEJMoa2001342> e um resumo desses resultados pode ser lido aqui: <https://www.futuremedicine.com/doi/10.2217/fon-2020-1291>

## Como a darolutamida foi projetada para funcionar?

A **darolutamida** foi projetada para bloquear os sinais dos hormônios andrógenos que podem causar o crescimento das células cancerígenas.

As células do câncer de próstata têm **receptores andrógenos** que respondem a hormônios andrógenos como a **testosterona**. Dentro da célula da próstata, a **testosterona** é convertida em uma versão ligeiramente diferente do hormônio, chamada de **diidrotestosterona**. Quando a **diidrotestosterona** se liga ao **receptor de andrógeno**, ela cria um sinal que faz com que as células cresçam.

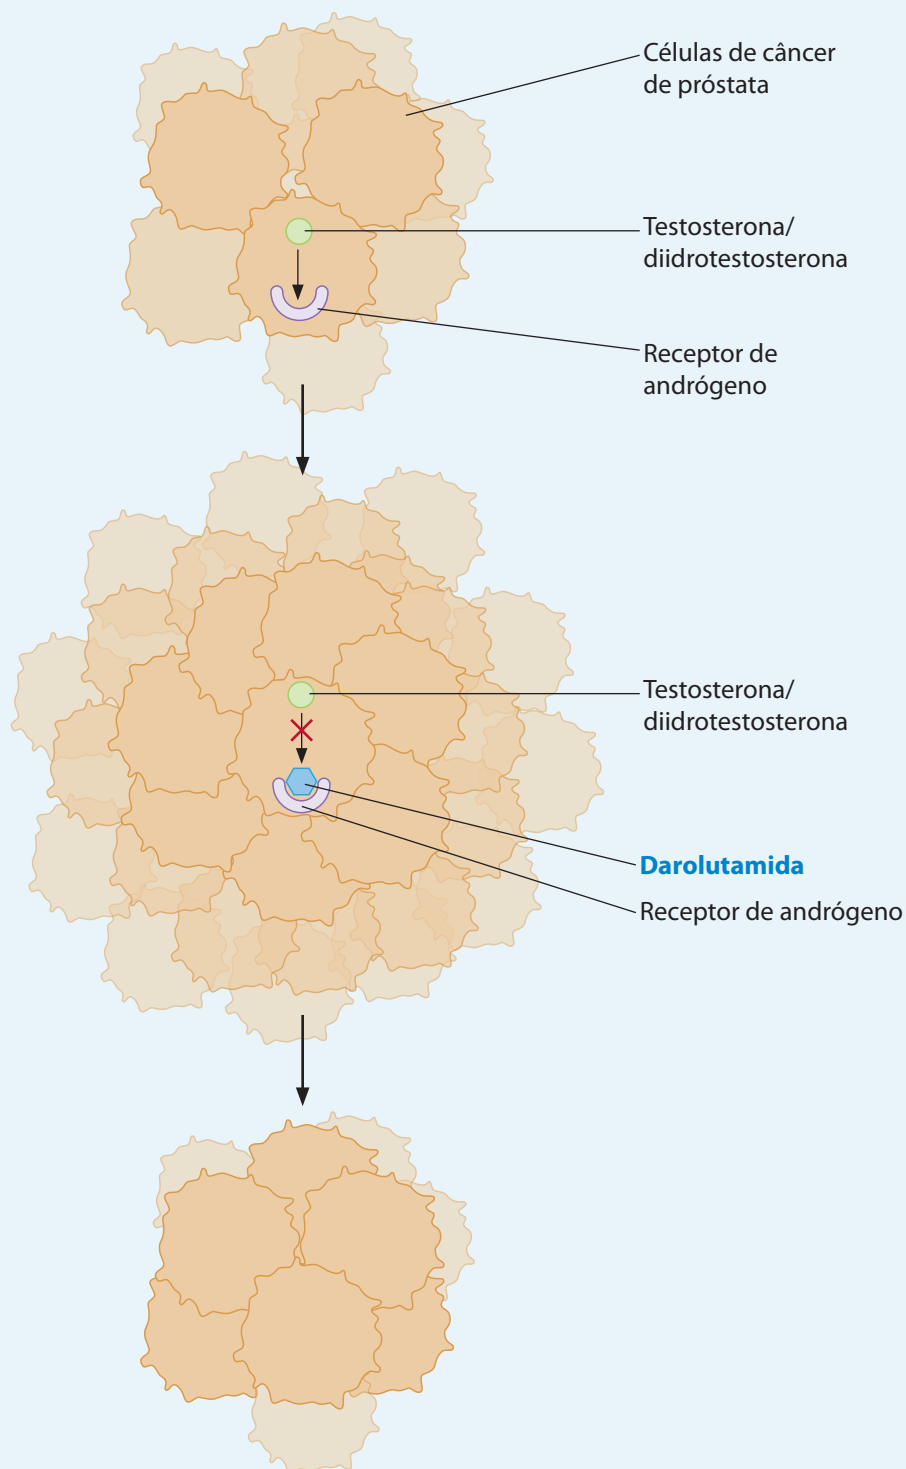

A **darolutamida** foi projetada para **bloquear** os sinais dos hormônios andrógenos que podem estimular o crescimento das células cancerígenas.

## Sobre o estudo ARASENS

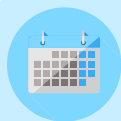

Começou em novembro de 2016 e ainda continuava em andamento em abril de 2022.

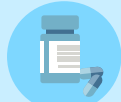

### Controlado com placebo

Um placebo tem a aparência de um tratamento experimental, mas não contém nenhum medicamento. Os pesquisadores usam um **placebo** para garantir que os efeitos do tratamento experimental estão sendo realmente causados pelo tratamento experimental. Neste estudo, além de **TPA** e **docetaxel**, cerca de metade dos pacientes do estudo recebeu placebo. A outra metade recebeu **darolutamida**.

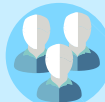

Incluiu 1.306 pacientes com CPHSm.

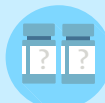

### Duplo-cego

Pacientes, pesquisadores ou médicos do estudo não sabiam qual tratamento cada paciente recebeu. Isso significa que eles estavam "cegos" em relação a essas informações.

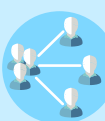

### Randomizado

Uma probabilidade aleatória computadorizada foi usada para colocar os pacientes do estudo em diferentes grupos de tamanhos iguais. É como jogar cara ou coroa.

## Sobre os pacientes no estudo ARASENS

**41–89 anos**

Intervalo de idade

**67 anos**

idade mediana

A mediana é o número do meio em uma lista de números organizados do menor para o maior.

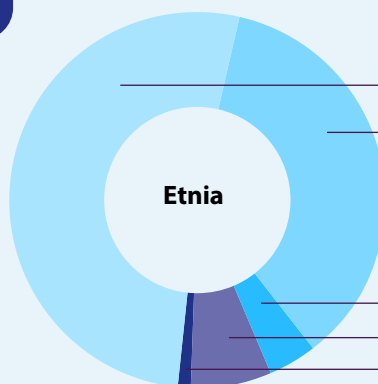

Branços: 52%

Asiáticos: 36%

Negros: 4%

Não informado: 7%

Outras: 1%

## Número de pacientes em 23 países

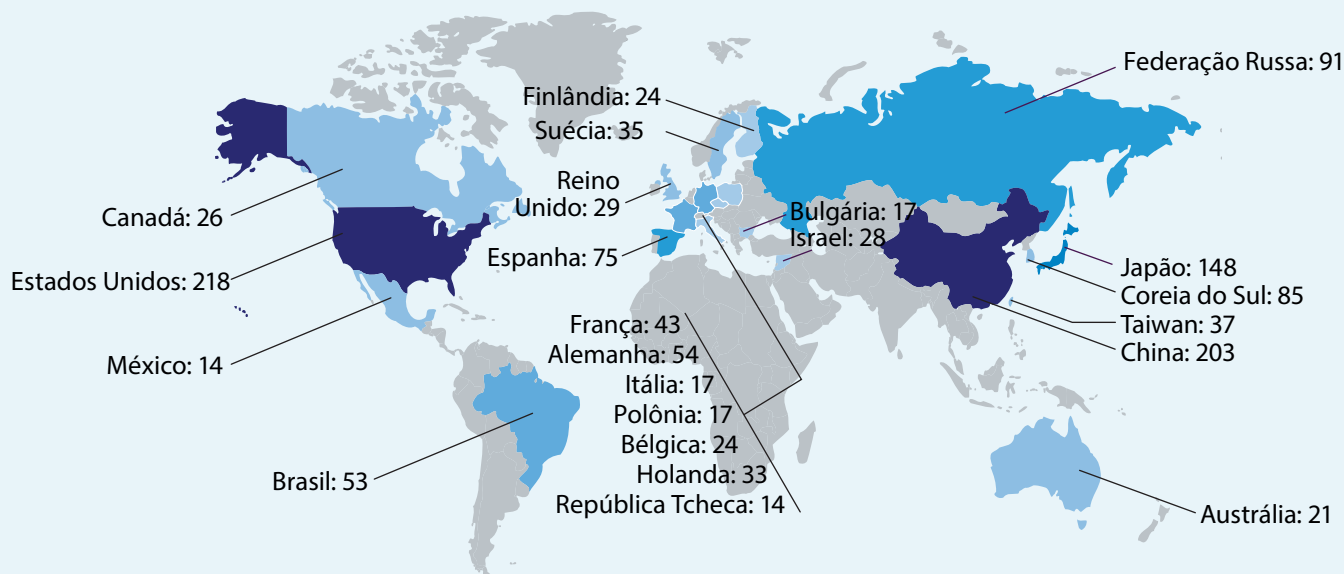

Para ser incluído no estudo ARASENS...

**era necessário que todos os pacientes:**

- ✓ tivessem câncer de próstata metastático confirmado.
- ✓ tivessem câncer de próstata que poderia ser tratado com TPA e docetaxel.
- ✓ tivessem uma pontuação de 0 ou 1 no teste do Eastern Cooperative Oncology Group (ECOG).  
O teste do ECOG mede o quanto o câncer está afetando a capacidade de o paciente executar as atividades diárias. As pontuações variam de 0 a 5, com pontuações mais altas significando maior incapacidade.
- ✓ tivessem medula óssea, fígado e rins suficientemente saudáveis.

**nenhum paciente poderia:**

- ✗ ter feito tratamento prévio com certas terapias hormonais, imunoterapias ou quimioterapias.
- ✗ ter feito tratamento prévio com terapias de radiação dentro de duas semanas após o início do estudo.
- ✗ ter câncer metastático anteriormente de tipo diferente, a menos que tenha sido tratado e controlado suficientemente bem.
- ✗ ter tido qualquer distúrbio no estômago ou intestino que possa afetar a forma como o tratamento experimental é absorvido pelo organismo.

## O que aconteceu no estudo ARASENS?

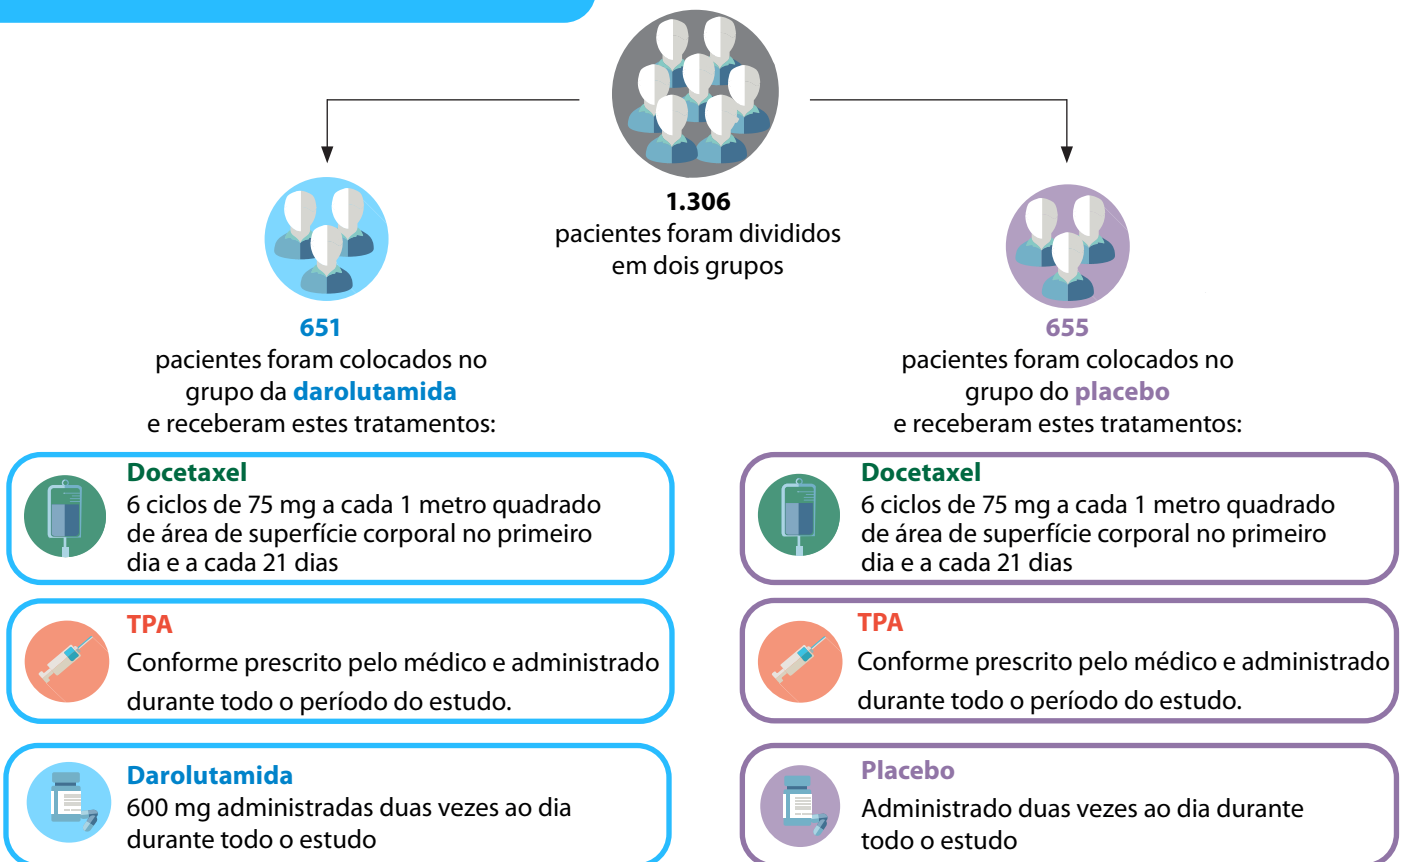

Os pacientes receberam **darolutamida** ou o **placebo**, além de **TPA** e **docetaxel**, até que alguma das seguintes situações ocorresse:

- O câncer piorasse
- A quimioterapia fosse alterada
- Eles sofressem efeitos muito tóxicos por causa do tratamento
- Eles ou o médico deles decidissem interromper o tratamento por outras razões

## Quais foram os resultados?

O objetivo do estudo ARASENS era saber se a combinação de **darolutamida** com **TPA** e **docetaxel** ajudou a tratar pacientes com CPHSm melhor do que o **placebo** com **TPA** e **docetaxel**.

Os pesquisadores queriam saber as respostas para várias perguntas e determinar se a combinação com **darolutamida** estava funcionando melhor do que o **placebo**. Para responder a essas perguntas, os pesquisadores coletaram dados dos pacientes do estudo até outubro de 2021.

Eles compararam os resultados dos pacientes que receberam **darolutamida** com os pacientes que receberam o **placebo**. Os resultados abaixo foram semelhantes em todos os grupos étnicos.

Abaixo estão as respostas para essas perguntas.

Em comparação com o **placebo**, adicionar a **darolutamida** à **TPA** com **docetaxel** ajudou?

os pacientes do estudo passaram a viver mais?

Sim

### Redução de risco

O tratamento com **darolutamida** aumentou a chance de sobrevivência e reduziu o risco de morte em **32,5%** em comparação com o **placebo**.

### Após 4 anos de tratamento experimental,

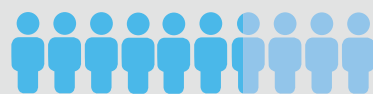

**62,7%** dos pacientes no **grupo da darolutamida** ainda estava vivo

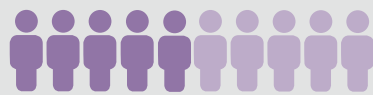

**50,4%** dos pacientes do **grupo do placebo** ainda estava vivo

a atrasar a transformação do câncer em resistente à castração?

Sim

Quando o câncer de próstata se torna resistente à castração, isso significa que não está mais respondendo ao tratamento com TPA e o crescimento de células cancerígenas pode aumentar.

O tratamento com **darolutamida** aumentou o tempo de resposta dos pacientes à TPA e não exigiu mudança de tratamento. Também reduziu o risco de o câncer se tornar resistente à castração em **64%** dos pacientes em comparação com o **placebo**.

### Em outubro de 2021

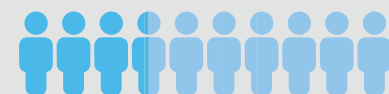

**35%** dos pacientes no **grupo da darolutamida** desenvolveram câncer resistente à castração.

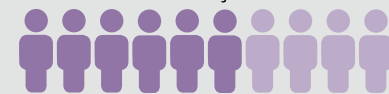

**60%** dos pacientes no **grupo do placebo** desenvolveram câncer resistente à castração

a atrasar a piora da dor?

Sim

A gravidade da dor foi medida usando um questionário chamado Brief Pain Inventory (Short Form), que foi preenchido pelos pacientes do estudo.

O tratamento com **darolutamida** aumentou o tempo de vida dos pacientes sem piora da dor e reduziu o risco de piora da dor em **21%** em comparação com o **placebo**.

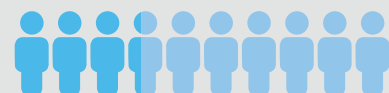

**34%** dos pacientes no **grupo da darolutamida** tiveram piora da dor

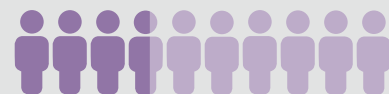

**38%** dos pacientes do **grupo do placebo** tiveram piora da dor



**a atrasar fraturas ósseas relacionadas ao câncer ou sintomas relacionados a fraturas ósseas?**

O câncer de próstata e o tratamento com TPA podem estar associados à fragilização óssea e ao aumento do risco de fraturas por causa de alterações nos níveis hormonais.

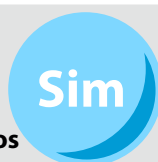

O tratamento com a **darolutamida** aumentou o tempo para que os pacientes desenvolvessem fraturas ósseas relacionadas ao câncer e sintomas associados. Esse tratamento também reduziu o risco de fraturas e sintomas associados em **29%** em comparação com o **placebo**.

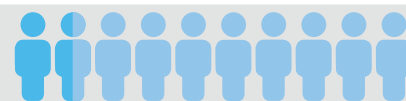

**15%** dos pacientes no **grupo da darolutamida** tinha fraturas ósseas relacionadas ao câncer ou sintomas relacionados a fraturas ósseas

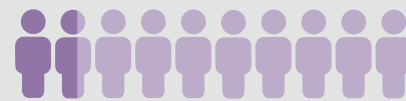

**17%** dos pacientes no **grupo do placebo** tinha fraturas ósseas relacionadas ao câncer ou sintomas relacionados a fraturas ósseas

**a atrasar a necessidade de terapias adicionais para câncer?**

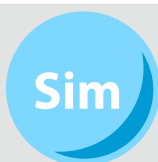

Em geral, o tratamento com a **darolutamida** aumentou o tempo para que os pacientes precisassem de terapias adicionais para câncer e reduziu o risco de precisar de terapias adicionais para câncer em **61%** em comparação com o **placebo**.

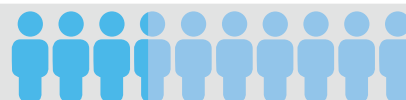

**34%** dos pacientes no **grupo da darolutamida** precisaram de terapias adicionais para combater o câncer

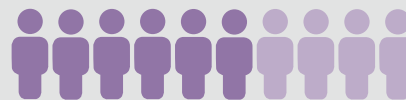

**60%** dos pacientes no **grupo do placebo** precisaram de terapias adicionais para combater o câncer

**a atrasar a piora de sintomas físicos relacionados ao câncer?**

A gravidade dos sintomas relacionados ao câncer foi medida através de um questionário chamado Functional Assessment of Cancer Therapy Prostate Cancer Symptom Index - 17 Item Version, que foi preenchido por pacientes do estudo.

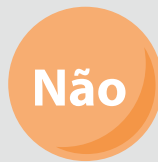

No geral, o tratamento com **darolutamida** não aumentou o tempo necessário para que os sintomas físicos relacionados ao câncer dos pacientes piorassem e não reduziu o risco de agravamento dos sintomas físicos relacionados ao câncer em comparação com o **placebo**.

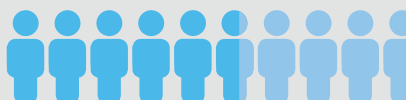

**54%** dos pacientes no **grupo da darolutamida** apresentaram piora dos sintomas físicos relacionados ao câncer.

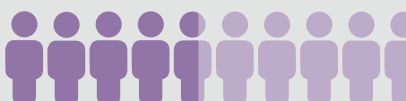

**47%** dos pacientes no **grupo do placebo** apresentaram piora dos sintomas físicos relacionados ao câncer

**a atrasar o uso de opioides por sete ou mais dias seguidos?**

O medicamento opioide é usado para controlar a dor.

Os pesquisadores não puderam responder a essa pergunta devido à maneira como desenharam o estudo. Eles criaram o estudo para que cada pergunta que eles quisessem responder fosse classificada por importância. Se os pesquisadores concluíram que a resposta a uma pergunta é "Não" com base nos resultados do estudo, eles não analisaram os resultados das perguntas classificadas restantes. Ter criado o estudo dessa forma ajuda a garantir que os resultados sejam os mais precisos possíveis. Esta pergunta obteve a classificação mais baixa, e a resposta para a pergunta classificada acima foi "Não". Portanto, os pesquisadores não analisaram os resultados para esta pergunta.

Não tem certeza

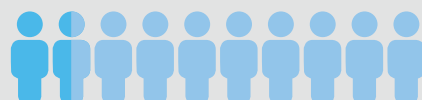

**14%** dos pacientes no **grupo da darolutamida** usaram opioides por sete ou mais dias seguidos

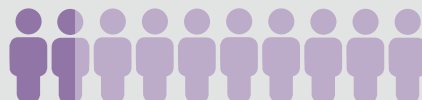

**18%** dos pacientes no **grupo do placebo** usaram opioides por sete ou mais dias seguidos.

Quantos pacientes do estudo tiveram eventos adversos?

Neste resumo, qualquer problema médico que ocorreu durante o estudo é chamado de “evento adverso”. Os eventos adversos são considerados graves quando levam à morte, colocam em risco a vida do paciente, requerem hospitalização, são incapacitantes ou são clinicamente importantes.

Eventos adversos **podem ou não estar relacionados** aos tratamentos do estudo. É por isso que eventos adversos não são o mesmo que “efeitos colaterais”. Os efeitos colaterais são conhecidos por estarem relacionados a um tratamento. É preciso pesquisar muito para saber com certeza se um evento adverso está relacionado a um tratamento.

No geral, a percentagem de pacientes com eventos adversos foi semelhante no **grupo da darolutamida** e no **grupo do placebo**. A combinação de **darolutamida** com **TPA** e **docetaxel** não resultou em mais efeitos tóxicos do que a combinação de **placebo** com TPA e **docetaxel**. Muitos dos eventos adversos mais comuns ocorreram com mais frequência no início do estudo, quando os pacientes estavam recebendo **docetaxel**.

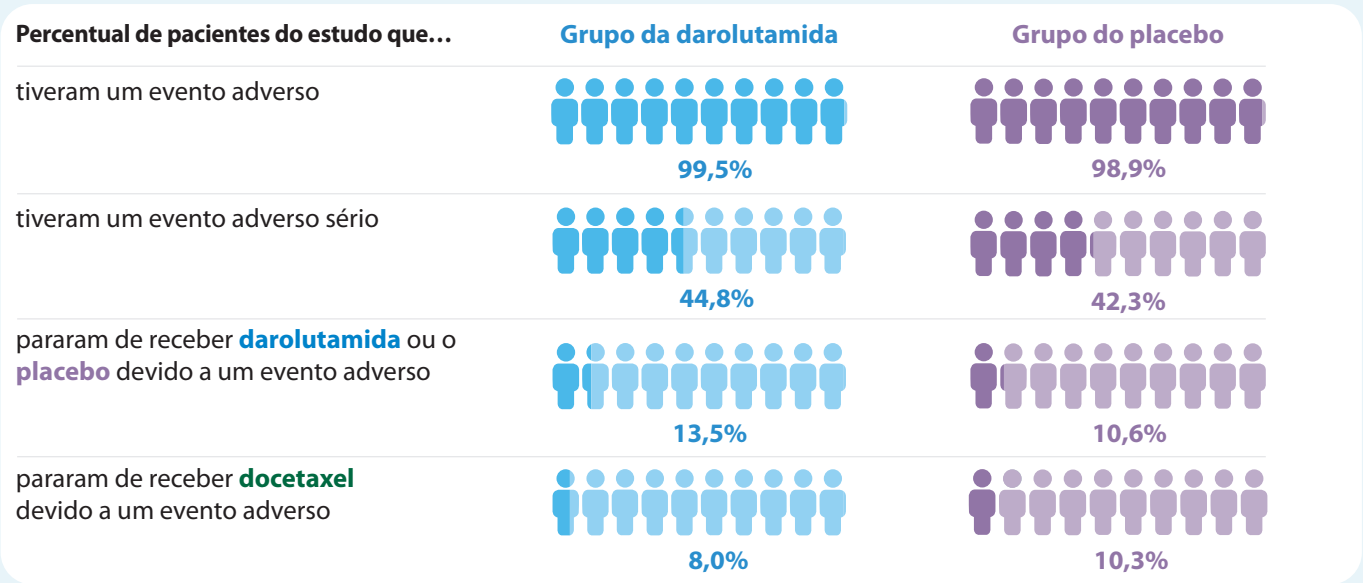

Quais eventos adversos de grau 3 ou 4 afetaram mais de 2% dos pacientes do estudo?

Os eventos adversos são categorizados em cinco grupos diferentes com base na gravidade:

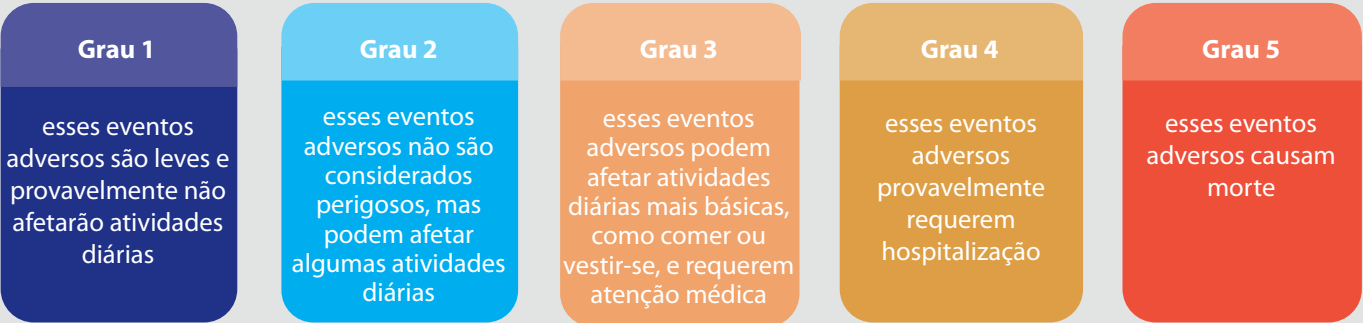



A tabela abaixo mostra os eventos adversos de grau **3** ou **4** que ocorreram em **mais de 2,0%** dos pacientes durante o estudo.

| Evento adverso                                                                                               | Grupo da darolutamida                                                                        | Grupo do placebo                                                                              |
|--------------------------------------------------------------------------------------------------------------|----------------------------------------------------------------------------------------------|-----------------------------------------------------------------------------------------------|
| Baixos níveis de neutrófilos, um tipo de glóbulo branco que ajuda o corpo a combater infecções (neutropenia) | <br>33,7%  | <br>34,2%  |
| Febre e baixos níveis de neutrófilos (neutropenia febril)                                                    | <br>7,8%   | <br>7,4%   |
| Pressão alta (hipertensão)                                                                                   | <br>6,4%   | <br>3,2%   |
| Sem glóbulos vermelhos saudáveis suficientes (anemia)                                                        | <br>4,8%   | <br>5,1%   |
| Uma infecção nos pulmões chamada de pneumonia                                                                | <br>3,2% | <br>3,1% |
| Diabetes e níveis elevados de açúcar no sangue (hiperglicemia)                                               | <br>2,8% | <br>3,7% |
| Tiveram um aumento dos níveis de alanina aminotransferase (ALT), um sinal de inflamação no fígado            | <br>2,8% | <br>1,7% |
| Aumento dos níveis de aspartato aminotransferase (AST), um sinal de danos no fígado                          | <br>2,6% | <br>1,1% |
| Ganho de peso                                                                                                | <br>2,1% | <br>1,2% |
| Infecção do trato urinário                                                                                   | <br>2,0% | <br>1,8% |

### Quais eventos adversos de interesse os pacientes do estudo tiveram?

Pesquisas anteriores mostraram que o tratamento com **TPA** pode estar associado a eventos adversos específicos. Os pesquisadores queriam saber se os pacientes neste estudo também tiveram eventos adversos semelhantes quando a **darolutamida** foi tomada com **TPA**. Esses eventos são chamados de “eventos adversos de interesse”.

A tabela abaixo mostra os **eventos adversos de interesse** que ocorreram durante o estudo.

| Evento adverso de interesse                                                                        | Grupo da darolutamida                                                                        | Grupo do placebo                                                                               |
|----------------------------------------------------------------------------------------------------|----------------------------------------------------------------------------------------------|------------------------------------------------------------------------------------------------|
| Sentir-se mais cansado do que o habitual (fadiga)                                                  | <br>33,1%   | <br>32,9%   |
| Fogachos                                                                                           | <br>20,4%   | <br>21,7%   |
| Erupções cutâneas                                                                                  | <br>16,6%   | <br>13,5%   |
| Diabetes e níveis elevados de açúcar no sangue (hiperglicemia)                                     | <br>15,2%   | <br>14,3%   |
| Pressão alta (hipertensão)                                                                         | <br>13,7%  | <br>9,2%   |
| Distúrbios cardíacos (arritmia cardíaca, distúrbio na artéria coronária ou insuficiência cardíaca) | <br>10,9% | <br>11,7% |
| Fratura óssea                                                                                      | <br>7,5%  | <br>5,1%  |
| Quedas                                                                                             | <br>6,6%  | <br>4,6%  |
| Fadiga mental, também chamada de confusão mental (transtorno cognitivo)                            | <br>3,5%  | <br>2,3%  |
| Perda de peso                                                                                      | <br>3,4%  | <br>5,4%  |
| Depressão                                                                                          | <br>3,2%  | <br>3,7%  |
| Inchaço do tecido mamário (ginecomastia)                                                           | <br>3,2%  | <br>1,5%  |
| O cérebro não recebe sangue suficiente (isquemia cerebral)                                         | <br>1,2%  | <br>1,2%  |
| Convulsão                                                                                          | <br>0,6%  | <br>0,2%  |

## Qual é o significado dos resultados?

Neste estudo, a combinação de **darolutamida** com **TPA** e **docetaxel** ajudou a tratar os pacientes do estudo com CPHSm melhor do que o **placebo** com **TPA** e **docetaxel**.

Os pacientes do estudo no **grupo da darolutamida** viveram mais do que aqueles no **grupo do placebo**. A **darolutamida** ajudou os pacientes do estudo a viver mais do que aqueles que receberam o **placebo**, embora os pacientes do estudo que receberam o **placebo** muitas vezes tenham passado por tratamentos que prolongam a sobrevida após a piora do câncer.

Os pacientes do estudo no **grupo da darolutamida** tiveram um atraso na transformação do câncer em resistente à castração, na piora da dor, no desenvolvimento de fraturas ósseas relacionadas ao câncer ou sintomas relacionados e na necessidade de terapias adicionais para câncer em comparação com os pacientes no **grupo do placebo**.

A percentagem de pacientes do estudo com eventos adversos foi semelhante no grupo da darolutamida e no **grupo do placebo**. A combinação de **darolutamida** com **TPA** e **docetaxel** não resultou em mais efeitos tóxicos do que a combinação de **placebo** com TPA e **docetaxel**.

**Darolutamida** em combinação com **TPA** e **docetaxel** pode ser uma opção de tratamento para pacientes com CPHSm. Os pacientes devem sempre conversar com seus médicos e enfermeiros antes de tomar qualquer decisão sobre o seu tratamento.

## O que o estudo ARASENS significa para a comunidade de pacientes?

“Pacientes com câncer de próstata (CaP) precisam de opções de tratamento, especialmente os pacientes metastáticos (com câncer de próstata fora da próstata). O estudo ARASENS oferece mais uma opção para pacientes metastáticos, porém ainda “sensíveis à hormonioterapia” (responsivos a TPA/tratamentos hormonais).

Como uma defensora dos direitos dos pacientes com CaP há 20 anos, eu gostaria de aproveitar esse tempo para incentivá-los a manterem-se envolvidos com seus próprios cuidados, especialmente se forem metastáticos. Tomada de Decisão Compartilhada é um termo válido na medicina, e significa que você compartilha as decisões com seus médicos e enfermeiros e eles compartilham as decisões com você. Falo por experiência própria, por causa do diagnóstico de CP metastático do meu marido no ano 2000 e um PSA de 7.096. Ele viveu por 13 anos, muito por causa do nosso envolvimento nas decisões do tratamento dele. Escrevi um artigo sobre isso em 2013, intitulado “[Understanding Survival Statistics](#)”.

Lembre-se de que o câncer de próstata de cada homem é diferente, mas Antonov, *et al.*, publicou um estudo de caso em 2019 intitulado “[Unexpected Long-Term Survival in an Adult Patient with Metastatic Prostate Cancer](#)” Eu gostaria de encorajar todos a ler esse artigo, pois ilustra um estudo de caso de sobrevivência a longo prazo de um paciente com CP metastático com 87 anos de acordo com o último relatório.

Lembre-se de que novas opções de tratamento ainda estão no horizonte, pois muitos estudos clínicos ainda estão em andamento neste exato momento. Não conseguimos calcular o impacto das novas opções de tratamento e integrar essas informações, incluindo o dado de sobrevida, com os dados atuais. O estudo ARASENS oferece mais uma opção de tratamento, e pacientes, cuidadores e defensores continuarão atentos ao aparecimento de mais opções ao longo do tempo.

Mantenha-se envolvido com seus próprios cuidados. Pesquise a frase “Tomada de Decisão Compartilhada” e veja o que. Mesmo os melhores dados não conseguem medir tudo, inclusive o poder que você tem em sua própria jornada contra o câncer.

– J Manarite, cuidadora de pacientes com câncer de próstata

“Os resultados do estudo ARASENS trazem uma série de benefícios significativos para pacientes com câncer de próstata metastático hormônio-sensível quando comparados aos tratamentos padrão existentes. Os pacientes nesta fase da jornada do enfrentamento do câncer de próstata estão mais interessados em tratamentos que prolongarão suas vidas e terão impacto mínimo em sua qualidade de vida.

A darolutamida, conforme demonstrado pelo estudo ARASENS, proporciona uma redução de 32,5% no risco de morte e aumenta em 64% o tempo para o câncer se tornar resistente à castração. Esses são benefícios reais que todos os pacientes podem comemorar. Embora a diminuição do risco de morte seja mais atraente, retardar a resistência à castração da doença prolonga o tempo para os pacientes precisarem fazer a transição para tratamentos mais severos e a piora da qualidade de vida associados a eles. Nós, como pacientes, gostaríamos de ver o câncer de próstata se tornar uma doença crônica em oposição a uma doença que nos mata, e esses dois fatores do bem-sucedido estudo ARASENS permitem darmos mais um passo para alcançar esse objetivo.

Atualmente, a incidência de pacientes diagnosticados inicialmente com doença metastática tem aumentado rapidamente, tornando o estudo ARASENS muito oportuno para todos os pacientes com câncer de próstata. Homens afro-americanos que são mais afetados pelo câncer de próstata, com maior incidência e taxas de mortalidade e histórico de ter a doença em estágio mais avançado, podem se beneficiar significativamente do tratamento com darolutamida para câncer de próstata metastático hormônio-sensível”.

– T Farrington, paciente com câncer de próstata

“Fui diagnosticado em março de 2017, com um escore de Gleason de 4+3 e fiquei surpreso com a notícia. Não sabia a quem recorrer para obter orientação e fiquei com medo. Eu me senti sobrecarregado tentando me informar na internet. Tive a sorte de encontrar a [www.ANCAN.org](http://www.ANCAN.org), que ajudou a mim e a outros homens na mesma posição encarar a nossa doença e nos ensinou a sermos os nossos melhores defensores. Quando consegui me acalmar, pude entender a pesquisa e quanto progresso foi feito no que tange tratamentos de ponta. Quanto mais informações (especialmente escritas em termos simples) eu tiver, mais confiante me sinto em poder viver uma vida normal sem medo”.

– D Muslin, paciente com câncer de próstata

## Quem patrocinou o estudo ARASENS?

O estudo ARASENS foi financiado pela Bayer e a Orion Pharma.

## Onde os leitores podem encontrar mais informações sobre este estudo?

A publicação original discutida neste resumo se chama: “Darolutamida and Survival in Metastatic, Hormone-Sensitive Prostate Cancer”, publicada no *New England Journal of Medicine* em fevereiro de 2022. Você pode ler o artigo original em: <https://www.nejm.org/doi/full/10.1056/NEJMoa2119115>

O nome completo do estudo ARASENS é: A Randomized, Double-blind, Placebo Controlled Phase Study of Darolutamida (ODM-201) Versus Placebo in Addition to Standard Androgen Deprivation Therapy and Docetaxel in Patients with Metastatic Hormone Sensitive Prostate Cancer.

Você pode ler mais sobre o estudo ARASENS nos seguintes sites:

- Digite o número do estudo, **NCT02799602**, no campo de pesquisa “Other terms” em [www.clinicaltrials.gov](http://www.clinicaltrials.gov).
- Insira o identificador EudraCT **2015-002590-38** no campo de pesquisa em [www.clinicaltrialsregister.eu](http://www.clinicaltrialsregister.eu). Clique em “Home & Search” para encontrar a opção de pesquisa.

Se você foi um paciente do estudo e tiver dúvidas sobre os resultados deste estudo e sobre a darolutamida, fale com o médico ou a equipe do local do estudo.

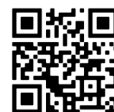

Um vídeo animado descrevendo este estudo está disponível online. Aponte a câmera do seu celular para o QR Code para acessar o link e assistir ao vídeo.

## Recursos educacionais

- Leia mais sobre o câncer de próstata no site da Prostate Cancer Foundation em: <https://www.pcf.org/guide/prostate-cancer-patient-guide/>
- A maioria dos países do mundo tem agências e fundações nacionais dedicadas ao combate do câncer de próstata. Essas organizações fornecem explicações, opções de tratamento, recursos educacionais e suporte para pessoas interessadas em manter a saúde da próstata. Além de assistência após o diagnóstico de câncer de próstata. Peça aos seus médicos e enfermeiros ou grupo de apoio comunitário para indicar a você essas organizações.

## Agradecimentos

Os autores gostariam de agradecer aos pacientes do estudo ARASENS e seus familiares e cuidadores. Eles também gostariam de agradecer à equipe do estudo que cuidou e deu apoio aos pacientes no estudo. Sem todas essas pessoas trabalhando juntas, os estudos clínicos não avançariam.

A ajuda para a escrita médica e a ajuda editorial para o desenvolvimento deste resumo foram fornecidas por Kimbra Edwards, PhD, e Scott Finger, do Center for Information & Study on Clinical Research Participation (CISCRP), uma organização sem fins lucrativos focada em educar e informar o público sobre a participação em pesquisas. A ajuda na escrita médica e a ajuda editorial tiveram o apoio da Bayer.

## Divulgação de interesses financeiros e conflitantes

MR Smith informa ter recebido honorários de consultoria da Amgen, Astellas Pharma, Bayer, Eli Lilly and Company, Janssen Biotech e Pfizer. M Hussain informa ter recebido honorários de consultoria da Bayer, Daiichi Sankyo Company, Janssen Global Services, LLC e Novartis, bem como honorários da AstraZeneca e suporte para viagem da Bayer. F Saad informa ter recebido honorários da Astellas Pharma, AstraZeneca, Bayer, Bristol-Myers Squibb, Janssen Global Services, LLC, Merck, Myovant sciences, Pfizer e Sanofi Pasteur Inc. K Fizazi informa ter recebido honorários de consultoria pagos à sua instituição pela Amgen, Astellas Pharma, AstraZeneca, Bayer, Clovis Oncology, Inc., Janssen Biotech, MSD, Novartis, Pfizer e Sanofi-Aventis U.S. LLC, bem como honorários de consultoria da Orion Corporation e CureVac. CN Sternberg informa ter recebido honorários de consultoria da Astellas Pharma, AstraZeneca, Bayer HealthCare Pharmaceuticals Inc., Bristol Myers Squibb Company, Genentech, Incyte Corporation, Medscape Oncology, Merck, Merck Sharp & Dohme Corporation, Pfizer, Sanofi e Genzyme US Companies e Uro Today. ED Crawford relata ter recebido honorários de consultoria da Astellas Pharma, Carden Jennings, Janssen Biotech Inc., MDx e TOLMAR Pharmaceuticals, Inc., bem como pelo monitoramento e segurança de dados da Bayer HealthCare Pharmaceuticals Inc., e possui propriedade intelectual em biópsia óptica. B Tombal relata ter recebido honorários de consultoria da Bayer HealthCare Pharmaceuticals Inc. Os autores não têm outras afiliações relevantes ou envolvimento financeiro com qualquer organização ou entidade que detenha interesse financeiro ou conflito financeiro em relação ao assunto ou aos materiais discutidos no manuscrito além dos divulgados.
